# Supplementary material for: Is Health Related Quality of Life (HRQoL) a valid indicator for health systems evaluation?
Source: PubMed Central journal article supplement (PMC3866375; doi:10.1186/2193-1801-2-664), 2013-12-11

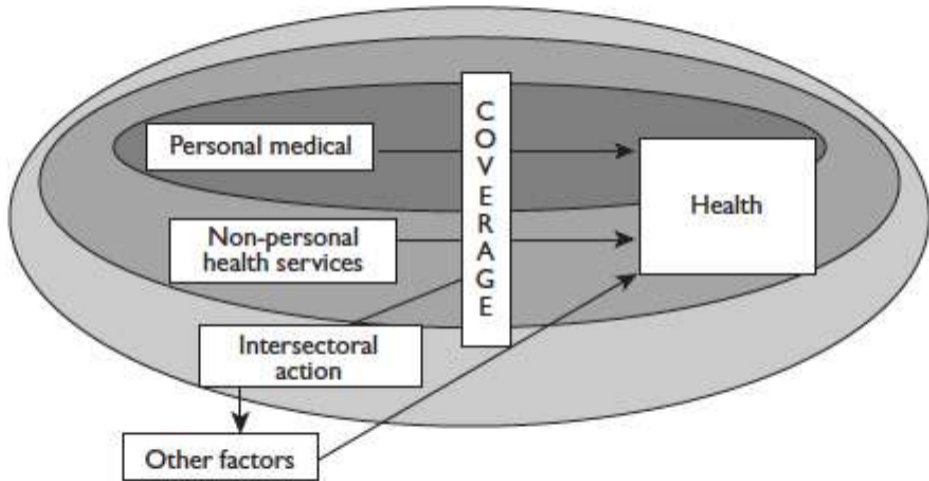

Supplement: 40064_2013_731_MOESM1_ESM.pdf [file 40064_2013_731_MOESM1_ESM.pdf]
